# Supplementary material
Source: Research Square preprint supplement (doi:10.21203/rs.3.rs-8737686/v1)
Supplement: Supplementary file 1 [file 141f9a2e76d6afe8c14a8214.docx]

**Supplementary 1: Curriculum**

Module 1: Fundamentals of Human Genomics

Participants will:

- Understand human genome structure
- Identify and classify variant types SNVs, indels, CNVs, SVs
- Apply HGVS nomenclature accurately
- Recognize inheritance models and their relevance to variant interpretation

Core Competencies

- Accurate genomic terminology usage
- Correct HGVS variant description
- Mapping inheritance patterns to disease mechanisms

Module 2: Secondary Analysis and NGS Data Structure

Participants will:

- Understand the full NGS data pipeline from sequencing to variant calls
- Interpret FASTQ, BAM, and VCF files
- Understand principles of alignment, variant calling, and annotation
- Navigate BaseSpace for analysis tracking and archival

Core Competencies

- Ability to identify data integrity issues
- Understanding limitations of secondary analysis outputs
- Traceability of data processing steps

Tools: Base Space

Module 3: Quality Control Metrics in NGS

Participants will:

- Evaluate sequencing QC metrics (coverage, depth, uniformity, GC bias)
- Evaluate CNV quality by Dragen
- Assess QC impact on variant reliability
- Decide when results are reportable or require repeat testing

Core Competencies

- QC-driven decision-making
- Documentation of analytical limitations
- Risk-based interpretation

Module 4: Laboratory Workflow Exposure

Participants will:

- Understand wet-lab processes and QC checkpoints
- Recognize laboratory artifacts affecting variant calls
- Communicate effectively with wet-lab teams

Core Competencies

- Cross-disciplinary communication
- Identification of technical artifacts
- Context-aware interpretation

Module 5: Genomic Databases and External Evidence Sources

Participants will:

- Use population, clinical, and functional databases for variant interpretation
- Understand strengths, limitations, and population biases
- Extract evidence systematically for classification

Core Competencies

- Evidence sourcing and documentation
- Critical appraisal of database assertions
- Population-aware interpretation

Resources

- gnomAD, ClinVar, PanelAPP, HGMD, ClinGen, Gene review, DECIPHER, UCSC Genome Browser

Module 6: Tertiary Analysis and Variant Prioritization

Participants will:

- Apply phenotype-driven and gene-panel–based filtering strategies
- Prioritize variants for clinical interpretation
- Document analytic reasoning

Core Competencies

- Reproducible filtering strategies
- Structured analytic workflows
- Transparent decision documentation

Tools

Franklin tertiary tool.

Module 7: Gene–Disease Association Frameworks

Participants will:

- Apply ClinGen gene–disease validity frameworks
- Understand gene curation's impact on panel design and interpretation
- Distinguish established vs emerging gene–disease relationships

Core Competencies

- Gene validity assessment
- Risk-aware reporting
- Panel content evaluation

Frameworks

- ClinGen Gene Disease Validity

Module 8: Variant Interpretation Guidelines and Standards

Participants will:

- Apply ACMG/AMP classification criteria
- Use ClinGen general recommendation and ACGS refinements
- Use CSpecs for specific gene.
- Integrate institutional SOPs into interpretation

Core Competencies

- Consistent variant classification
- Evidence weighting and justification
- Reclassification workflows

Guidelines

- ACMG/AMP, ClinGen CSpecs, ACGS

Module 9: Ethics, Legal, and Professional Practice

Participants will:

- Understand national genetic information laws
- Apply confidentiality and data protection principles
- Recognize ethical challenges in variant interpretation

Core Competencies

- Ethical decision-making
- Regulatory compliance
- Professional accountability

TRAINING ROADMAPS

Months 1

- Modules 1–9
- Focus: genomic foundations, NGS structure, QC

Months 2-5

- Supervised tertiary analysis
- Case-based filtering exercises

Months 6

- Final competency assessment (20 cases blinded test)

Outcome:
 Qualified Variant Analyst (routine casework under SOPs)
