# Supplementary material
Source: Research Square preprint supplement (doi:10.21203/rs.3.rs-8737686/v1)
Supplement: Supplementary file 2 [file c4b712f5e5eee1923c0d91a4.docx]

**Professional Survey Questionnaire**

***Section 1: Demographic and Professional Background***

**1. Gender**

- Female
- Male
- Other

**2. Institution Type**

- University / Research Institute
- Laboratory
- Health Maintenance Organization (HMO)
- Hospital
- Other

**3. Job Title**

- Genetic Counselor
- Clinical Geneticist (Physician)
- Clinical Bioinformatician
- Variant Analyst
- Laboratory Staff
- Other

**4. Academic Degree**

***What is your highest academic degree?***

- MSc
- MSc genetic counselor
- MD
- PhD
- Other

**5. Years of Professional Experience**

- Less than 1 year
- 1–3 years
- 3–5 years
- 5–10 years
- More than 10years

**6. Team Composition *(Multiple choice)***

- Genetic counselors
- Clinical geneticists
- Variant analysts
- Bioinformaticians (coding-focused)

**7. Do you hold a team lead or supervisory role?**

- Yes
- No

***Section 2: Training and Professional Development***

**8. How did you learn the profession? *(Multiple choice)***

- Structured in-house training
- Formal course (national or international)
- Observation of a senior analyst
- Self-learning

**9. Do you receive funding for professional training (courses or conferences)?**

- Yes
- No
- Partial funding

**10. Have you participated in international conferences?**

- Yes
- No

**11. How many professional conferences have you attended in the past year?**

- None
- 1–2
- 3
- More than 3

**12. Do you participate in a professional or scientific forum related to your field?**

- Yes
- No
- I would like to, but I am not familiar with any or do not have access

***Section 3: Employment Conditions and Satisfaction***

13. Work-from-Home Policy

- No
- One day per week
- Two days per week
- Flexible
- Fully remote

**14. Salary Satisfaction**

*On a scale of 1–5, how satisfied are you with your salary?*

- 1 – Not satisfied at all
- 2
- 3
- 4
- 5 – Very satisfied

**15. Satisfaction with Role**

- Not satisfied
- Needs improvement
- Satisfied
- Very satisfied

**16. Satisfaction with Employment Terms**

- Not satisfied
- Needs improvement
- Satisfied
- Very satisfied

**17. Do you feel your work is professionally valued by clinicians?**

- Yes
- No
- Partially

**18. Is there an opportunity for professional advancement at your workplace?**

- Yes
- No
- Uncertain

***Section 4: Tools and Methods for Variant Interpretation***

**19. Do you use ClinGen guidliens for variant classification?**

- Yes
- No

**20. Do you rely on automated or tertiary analysis tools for variant classification**

**(e.g., VarSome, Franklin)?**

- Yes
- No
- Only in combination with other evidence

**21. Do you use HGMD?**

- Yes
- No
- I would like to, but I do not have access

**22. Do you use a scoring-based method for variant classification?**

- Yes
- No
- Not familiar with this approach

***Section 5: Challenges and Future Directions***

**23. What are the main challenges in your professional work? *(Multiple choice)***

- Workforce shortage
- Limited access to bioinformatics tools and databases
- CNV analysis
- Variant classification
- Report writing
- Understanding the clinical context and genotype–phenotype correlation
- Keeping up with constantly evolving guidelines
- Other

**24. What areas do you believe should be improved in the field? *(Multiple choice)***

- Establishment of a national database
- Inter-institutional collaboration and data sharing
- File storage and data management systems
- Improvement of secondary/tertiary analysis tools
- Employment conditions
- Regulation and formalization of training and education for the profession
