# Supplementary material
Source: Research Square preprint supplement (doi:10.21203/rs.3.rs-8737686/v1)
Supplement: Supplementary file 3 [file e519d1b792235493c8353472.xlsx]

## Sheet: Sheet1
Gender	Institution Type	Work Experience	Job Title	Academic Degree	Satisfaction with Role	Satisfaction with Employment Terms	Work from Home	Main current challenges	What should be improved in the field?	Opportunity for professional advancement at your workplace	Do you feel your work is professionally valued?	Salary satisfaction (1–5, 5 = most satisfied)	Do you receive funding for training (courses, conferences)?	Have you participated in international conferences?	Team composition	Do You Participate in a Professional Forum?	How Did You Learn the Profession?	Years of Experience	Team Lead Role	Do You Use ClinGen for Classification?	Do You Rely on Automated Tools for Variant Classfication(e.g., VarSome/Franklin)?	Do You Use HGMD?	Do You Use a Scoring Methode for Variant Classification?	Your Analysis Team Is Composed Of
Female	HMO	1–3 years	Varianrt Scientists	MSc	Very Satisfied	Needs Improvement	One day a week	Understanding clinical context, Keeping up-to-date with evolving guidelines	Improving employment conditions, Building a national population database	Unknown	Yes	2	Yes	No	1-2	Yes	Observation of Expert Analyst	2-5	Variant Scientist	Yes	Yes	Yes	Yes	Variant Analyst
Female	HMO	5–10 years	Lab Technician	PhD	Very Satisfied	Satisfied	No	Keeping up-to-date with evolving guidelines, Understanding the clinical context , CNV analyses (deletions/duplications)	File-saving interface, Building a national population database	Unknown	Yes	4	Partially funded	Yes	1-2	Yes	Self-study, Official course in Israel/abroad, Structured workplace training, Shadowing an expert analyst	2-5	Variant Scientist	Yes	Yes, alongside other measures	No	Yes	Clinical Geneticist, Variant Analyst
Male	Public Hospital	1–5 years	Lab Technician	PhD	Very Satisfied	Satisfied	No	CNV analyses (deletions/duplications)	Formal training and building a national population database	Unknown	Yes	3	Partially funded	No	None	Yes	Self-study, observation of expert analyst, formal course (Israel/Abroad)	2-5	Variant Scientist	Yes	No	I’d like to, but I have no access	Yes	Bioinformatician (Programmer), Variant Analyst, Clinical Geneticist
Female	Public Hospital	More than 10 years	Lab Technician	MSc	Needs Improvement	Not Satisfied at All	One day a week	Keeping up-to-date with evolving guidelines, Understanding the clinical context, CNV analyses (deletions/duplications), Access to bioinformatics tools and databases	Improving employment conditions, Improving secondary/tertiary analysis tools, Building a national population database, Formalizing training and education for the profession	No	Yes	2	Partially funded, No	No	1-2	Yes	Self-study, observation of expert analyst	2-5	Variant Scientist	Yes	No	Yes	Yes	Clinical Geneticist, Variant Analyst, Bioinformatician (Programmer)
Female	HMO	1–5 years	Other	PhD	Needs Improvement	Needs Improvement	No	CNV analyses (deletions/duplications), access to bioinformatics tools and databases	Formal training and improving employment conditions	No	Yes	2	Partially funded	No	1-2	Yes	Observation of Expert Analyst	2-5	Variant Scientist	Yes	Yes, alongside other measures	Yes	Yes	Variant Analyst
Female	HMO	5–10 years	Lab Technician	PhD	Needs Improvement	Needs Improvement	No	Keeping up-to-date with evolving guidelines, Variant classification, Access to bioinformatics tools and databases, Staff shortages	Improving employment conditions, Formalizing training and education for the profession	Unknown	partial	1	No	No	None	Yes	Formal Course (Israel/Abroad)	2-5	Variant Scientist	Yes	No	I’d like to, but I have no access	Yes	Medical geneticist, Variant analyst, Genetic counselor
Female	Public Hospital	1–3 years	Lab Technician	PhD	Satisfied	Needs Improvement	One day a week	Keeping up-to-date with evolving guidelines, Understanding the clinical context , Staff shortages, CNV analyses (deletions/duplications)		No	Yes	2	Partially funded	Yes	1-2	Yes	Self-study		Other	Yes	No	Yes	Yes	Medical geneticist, Variant analyst, Genetic counselor
Male	HMO	5–10 years	Other	PhD	Very Satisfied	Needs Improvement	One day a week	Keeping up-to-date with evolving guidelines, CNV analyses (deletions/duplications), Staff shortages	Training, improving conditions, and building a national database	Unknown	Yes	3	Partially funded	No	1-2	Yes	Self-study	2-5	Variant Scientist	Yes	No	Yes	Yes	Variant Analyst, Clinical Geneticist
Female	HMO	1–5 years	Varianrt Scientists (Varianrt Scientists )	PhD	Very Satisfied	Very Satisfied	Two days	CNV analyses (deletions/duplications), Keeping up-to-date with evolving guidelines	Improving employment conditions, Collaboration and data sharing between centers, Formalizing training and education for the profession	Unknown	Yes	4		No		Yes	Shadowing an expert analyst, Structured workplace training	More than 5	Variant Scientist	Yes	Yes, alongside other measures	Yes	Yes	Bioinformatician (Programmer), Clinical Geneticist, Variant Analyst, Genetic Counselor
Male	HMO	1–3 years	Varianrt Scientists	MSc	Very Satisfied	Very Satisfied	One day a week	Understanding clinical context	Building a national database and cooperation between institutes	Unknown	Yes	4	Yes	No	1-2	Yes	Observation of Expert Analyst	2-5	Variant Scientist	Yes	Yes, alongside other measures	I’d like to, but I have no access	Yes	Bioinformatician (Programmer), Clinical Geneticist, Variant Analyst, Genetic Counselor
Male	Public Hospital	1–3 years	Varianrt Scientists	PhD	Satisfied	Satisfied	One day a week	Keeping up-to-date with evolving guidelines, Variant classification, CNV analyses (deletions/duplications), Access to bioinformatics tools and databases	Formalizing training and education for the profession, Improving employment conditions, Improving secondary/tertiary analysis tools, Collaboration and data sharing between centers, Building a national population database	Unknown	Yes	4	No	Yes	1-2	No	Self-study, Shadowing an expert analyst, Official course in Israel/abroad, Structured workplace training	2-5	Variant Scientist	Yes	Yes, alongside other measures	Yes	Yes	Clinical Geneticist, Variant Analyst
Female	HMO	More than 10 years	Varianrt Scientists	PhD	Satisfied	Needs Improvement	One day a week	Keeping up-to-date with evolving guidelines, Understanding the clinical context, Report writing, Variant classification, CNV analyses (deletions/duplications), Access to bioinformatics tools and databases, Staff shortages	Training, improving conditions, and building a national database	No	Yes	3	Partially funded	Yes	1-2	Yes	Self-study	2-5	Variant Scientist	Yes	No	Yes	Yes	Variant Analyst, Clinical Geneticist
Female	HMO	More than 10 years	Varianrt Scientists	PhD	Satisfied	Very Satisfied	One day a week	Keeping up-to-date with evolving guidelines, CNV analyses (deletions/duplications)	Improving employment conditions, Formalizing training and education for the profession	Yes	Yes	4	Yes	Yes	1-2	Yes	Observation of Expert Analyst	More than 5	Variant Scientist	Yes	No	Yes	Yes	Bioinformatician (Programmer), Genetic Counselor, Variant Analyst, Clinical Geneticist
Female	privaet lab	Less than one year	gentic counsler	MSc Genetic counselor	Satisfied	Satisfied	Flexible	Keeping up-to-date with evolving guidelines, Variant classification	Formalizing training and education for the profession, Improving employment conditions, Collaboration and data sharing between centers	Yes	Yes	3	Yes	No	1-2	Interested but unfamiliar / No access	Structured Workplace Training	2-5	Variant Scientist	Yes	No	Yes	No	Genetic counselor
Female	Public Hospital	5–10 years	Lab Technician	PhD	Needs Improvement	Satisfied	One day a week	Report writing, Staff shortages, CNV analyses (deletions/duplications)	Collaboration and data sharing between centers, Building a national population database, Improving secondary/tertiary analysis tools	No	Yes	4	Yes	Yes	1-2	Interested but unfamiliar / No access	Self-study	More than 5	Clinician	Yes	No	No	Yes	Genetic counselor, Variant analyst, Medical geneticist
Male	Public Hospital	5–10 years	Other	MSc	Needs Improvement	Needs Improvement	Two days	Keeping up-to-date with evolving guidelines, Access to bioinformatics tools and databases	Formal training and improving employment conditions	No	Yes	3	Yes	Yes	1-2	Interested but unfamiliar / No access	Self-study	More than 5	Clinician	Yes	No	I’d like to, but I have no access	No	Bioinformatician (Programmer), Genetic Counselor, Clinical Geneticist
Female	Public Hospital	More than 10 years	Other, Lab Technician	PhD	Very Satisfied	Satisfied	One day a week	Staff shortages	Collaboration and data sharing between centers	No	partial	4	Yes	Yes	1-2	No	Self-study	2-5	Clinician	No	Yes	Yes	Yes	Clinical Geneticist, Variant Analyst
Female	Public Hospital	1–5 years	Varianrt Scientists	PhD	Very Satisfied	Needs Improvement	One day a week	Keeping up-to-date with evolving guidelines, Variant classification, CNV analyses (deletions/duplications), Access to bioinformatics tools and databases	Improving employment conditions, File-saving interface, Improving secondary/tertiary analysis tools	No	Yes	3	Partially funded	Yes	1-2	Yes	Structured Workplace Training	2-5	Clinician	Yes	No	I’d like to, but I have no access	Yes	Genetic counselor, Medical geneticist, Variant analyst
Female	Public Hospital	More than 10 years	Varianrt Scientists	PhD	Very Satisfied	Needs Improvement	No	Understanding clinical context, staff shortage	Formalizing training and education for the profession, Improving employment conditions, Building a national population database, File-saving interface	Unknown	Yes	3	Partially funded	Yes	1-2	Yes	Self-study	2-5	Variant Scientist	Yes	Yes, alongside other measures	Yes	Yes	Variant Analyst, Clinical Geneticist
Female	privaet lab	1–5 years	Varianrt Scientists	MSc	Very Satisfied	Very Satisfied	Flexible	Staff shortages	Improving employment conditions	Yes	No	4	Yes	Yes	1-2	No	Structured Workplace Training	More than 5	Variant Scientist	Yes	No	No	No	Genetic counselor
Female	Public Hospital	1–5 years	Lab Technician	PhD	Satisfied	Needs Improvement	Two days	Understanding clinical context	Improving employment conditions, Building a national population database	Yes	Yes	2	No	No	1-2	Yes	Structured Workplace Training	2-5	Clinician	Yes	Yes, alongside other measures	No	Yes	Variant Analyst, Clinical Geneticist
Female	Public Hospital	More than 10 years	Lab Technician	PhD	Satisfied	Needs Improvement	One day a week	Keeping up-to-date with evolving guidelines, Variant classification, Access to bioinformatics tools and databases	Formal training, improving tools and employment conditions	Unknown	Yes	3	Yes	No	1-2	Yes	Observation of Expert Analyst	2-5	Variant Scientist	Yes	No	No	No	Bioinformatician (Programmer), Clinical Geneticist, Variant Analyst, Genetic Counselor
Female	privaet lab	5–10 years	Other	MSc Genetic counselor	Very Satisfied	Satisfied	Flexible	Keeping up-to-date with evolving guidelines	Improving employment conditions, Collaboration and data sharing between centers, Building a national population database	Yes	Yes	3	No	No	1-2	Interested but unfamiliar / No access	Structured Workplace Training	More than 5	Variant Scientist	Yes	No	Yes	Yes	Bioinformatician (Programmer), Genetic Counselor, Variant Analyst, Clinical Geneticist
Female	Public Hospital	More than 10 years	Lab Technician	MSc	Satisfied	Satisfied	One day a week	Understanding clinical context, CNV analyses (deletions/duplications), variant classification	Formalizing training and education for the profession, Improving employment conditions, File-saving interface, Collaboration and data sharing between centers, Building a national population database	No	partial	3	Partially funded	No	1-2	Interested but unfamiliar / No access	Self-study, observation of expert analyst, formal course (Israel/Abroad)	More than 5	Clinician	No	No	I’d like to, but I have no access	Yes	Genetic counselor, Medical geneticist, Variant analyst
Female	privaet lab	Less than one year	Varianrt Scientists	MSc Genetic counselor	Satisfied	Satisfied	Flexible	Variant classification, Report writing	Improving employment conditions	Yes	partial	3	Yes	No	1-2	Interested but unfamiliar / No access	Official course in Israel/abroad, Structured workplace training	2-5	Variant Scientist	No	No	Yes	Yes	Genetic counselor, Variant analyst, Medical geneticist
Female	privaet lab	1–5 years	Varianrt Scientists	MSc	Very Satisfied	Very Satisfied	Flexible	Keeping up-to-date with evolving guidelines	Collaboration and data sharing between centers	Yes	Yes	3	Yes	No	1-2	No	Structured Workplace Training	More than 5	Clinician	Yes	No	I’d like to, but I have no access	Yes	Genetic counselor, Variant analyst
Female	privaet lab	1–5 years	Varianrt Scientists	MSc Genetic counselor	Very Satisfied	Very Satisfied	Flexible	Keeping up-to-date with evolving guidelines, Access to bioinformatics tools and databases	Formalizing training and education for the profession, Improving employment conditions, Improving secondary/tertiary analysis tools, File-saving interface	Yes	Yes	4	No	Yes	None	No	Shadowing an expert analyst, Structured workplace training	More than 5	Variant Scientist	Yes	No	Yes	Yes	Genetic counselor, Medical geneticist, Variant analyst
Female	privaet lab	1–5 years	gentic counsler	MSc Genetic counselor	Very Satisfied	Satisfied	Flexible	Access to bioinformatics tools and databases	Improving employment conditions	Yes	partial	4	Partially funded	No	3	Yes	Structured Workplace Training	More than 5	Variant Scientist	Yes	No	Yes	Yes	Bioinformatician (Programmer), Genetic Counselor, Variant Analyst, Clinical Geneticist
Female	privaet lab	5–10 years	Varianrt Scientists	MSc Genetic counselor	Very Satisfied	Very Satisfied	Flexible	Staff shortages	Formal training and improving employment conditions	Yes	Yes	5	Yes	No	1-2	No	Shadowing an expert analyst, Structured workplace training, Self-study	More than 5	Variant Scientist	Yes	No	Yes	Yes	Bioinformatician (Programmer), Genetic Counselor, Clinical Geneticist, Variant Analyst
Female	privaet lab	1–3 years	gentic counsler	MSc Genetic counselor	Needs Improvement	Satisfied	Flexible	CNV analyses (deletions/duplications)	Improving employment conditions	Yes	Yes	3	Yes	Yes	1-2	No	Shadowing an expert analyst, Structured workplace training, Self-study	2-5	Variant Scientist	Yes	No	Yes	Yes	Genetic counselor, Medical geneticist, Variant analyst
Female	privaet lab	1–5 years	gentic counsler	MSc Genetic counselor	Very Satisfied	Very Satisfied	Flexible	Staff shortages	Improving employment conditions	Yes	partial	4	Yes	Yes	1-2	Interested but unfamiliar / No access	Structured Workplace Training	More than 5	Variant Scientist	Yes	No		I'm not familiar with the method	Genetic counselor, Variant analyst
Female	Public Hospital	5–10 years	Varianrt Scientists	MSc	Satisfied	Satisfied	One day a week	Understanding clinical context and CNV analyses (deletions/duplications)	Building a national population database	Unknown	partial	4	Partially funded	No	1-2	No	Formal Course (Israel/Abroad)	1	Clinician	Yes	No	No	Yes	Bioinformatician (Programmer), Clinical Geneticist
Female	privaet lab	1–5 years	Lab Technician	PhD	Very Satisfied	Very Satisfied	Flexible	Staff shortages	Improving employment conditions	Yes	Yes	4	No — partial funding	No	1-2	No	Structured Workplace Training	More than 5	Variant Scientist	Yes	No	Yes	Yes	Variant Analyst
Female	Public Hospital	1–5 years	genticsts	MD	Needs Improvement	Needs Improvement	One day a week	Keeping up-to-date with evolving guidelines, CNV analyses (deletions/duplications), Staff shortages	Formal training, national database, and improving secondary/tertiary analysis tools	Unknown	Yes	1	Partially funded	Yes	1-2	Yes	Formal Course (Israel/Abroad)	2-5	Other	Yes	Yes, alongside other measures	Yes	Yes	Clinical Geneticist, Variant Analyst
Female	HMO	1–3 years	Varianrt Scientists	MSc	Very Satisfied	Satisfied	One day a week	Access to bioinformatics tools and databases	Improving employment conditions, Building a national population database	Unknown	Yes	1	Yes	No	1-2	Yes	Observation of Expert Analyst	2-5	Variant Scientist	Yes	Yes	Yes	Yes	Variant Analyst
Female	Public Hospital	More than 10 years	gentic counsler	MSc Genetic counselor	Satisfied	Needs Improvement	One day a week	Keeping up-to-date with evolving guidelines, Report writing, CNV analyses (deletions/duplications), Staff shortages	Formalizing training and education for the profession, Improving employment conditions, Improving secondary/tertiary analysis tools, Collaboration and data sharing between centers, Building a national population database	No	Yes	2	Partially funded	No	3	Yes	Self-study, observation of expert analyst	2-5	Clinician	Yes	Yes	I’d like to, but I have no access	Yes	Genetic counselor, Medical geneticist
Female	Public Hospital	5–10 years	gentic counsler	MSc Genetic counselor	Very Satisfied	Satisfied	No	Keeping up-to-date with evolving guidelines	Improving employment conditions, Collaboration and data sharing between centers	Yes	partial	4	Yes	Yes	1-2	Yes	Observation of Expert Analyst	2-5	Clinician	Yes	No	Yes	Yes	Bioinformatician (Programmer), Clinical Geneticist, Genetic Counselor
Female	Public Hospital	5–10 years	gentic counsler	MSc Genetic counselor	Very Satisfied	Satisfied	Flexible	Keeping up-to-date with evolving guidelines, Variant classification, CNV analyses (deletions/duplications), Access to bioinformatics tools and databases	Formalizing training and education for the profession, Improving employment conditions, Improving secondary/tertiary analysis tools, Collaboration and data sharing between centers, Building a national population database	Unknown	Yes	3	Partially funded	No	1-2	Interested but unfamiliar / No access	Self-study, Shadowing an expert analyst, Structured workplace training	More than 5	Clinician		Yes, alongside other measures	Yes	No	Genetic counselor, Medical geneticist, Variant analyst
